# Supplementary material for: Effects of particle size on bifunctional Pt/SAPO-11 catalysts in the hydroisomerization ofn-dodecane
Source: Royal Society of Chemistry journal article supplement (doi:10.1039/c9nj06215g), 2020-01-01
Supplement: c9nj06215g1.pdf [file c9nj06215g1.pdf]

## Supporting Information

### Effects of particle size on bifunctional Pt/SAPO-11 catalysts in the hydroisomerization of *n*-dodecane

Lixia Ge<sup>a,b</sup>, Gan Yu<sup>a,c</sup>, Xinqing Chen<sup>\*a,b</sup>, Wenqian Li<sup>a</sup>, Wenjie Xue<sup>a</sup>, Minghuang Qiu<sup>a</sup>,  
Yuhan Sun<sup>\*a,b,c</sup>

<sup>a</sup> CAS Key Laboratory of Low-Carbon Conversion Science and Engineering, Shanghai Advanced Research Institute, Chinese Academy of Sciences, Shanghai 201210, China.

<sup>b</sup> University of Chinese Academy of Science, Beijing, 100049, China.

<sup>c</sup> School of Physical Science and Technology, Shanghai Tech University, Shanghai 201210, China.

Corresponding authors: chenxq@sari.ac.cn (X. Chen); sunyh@sari.ac.cn (Y. Sun)

## Content

**Fig. S1** The powder XRD patterns of SAPO-11-0%

**Fig. S2** The powder XRD patterns of SAPO-11-3%

**Fig. S3** The powder XRD patterns of SAPO-11-70%

**Fig. S4** The powder XRD patterns of SAPO-11-90%

**Fig. S5** The powder XRD patterns of Pt/SAPO-11-X (X=5%, 10%, 20%, 30%, 50%) samples

**Fig. S6** SAPO-11 particle size distribution images of (a)SAPO-11-5%; (b)SAPO-11-10%; (c)SAPO-11-20%; (d)SAPO-11-30%; (e)SAPO-11-50%

**Fig. S7** SEM images of SAPO-11-70% sample

**Fig. S8** SEM images of SAPO-11-90% sample

**Fig.S9** N<sub>2</sub> adsorption and desorption isotherms of Pt/SAPO-11-X (X=5%, 10%, 20%, 30%, 50%) samples

**Fig. S10** XRD patterns of SAPO-11-10% samples prepared with different crystalline times

**Fig. S11** SEM images of SAPO-11-10% samples prepared with different crystalline times(a) 0 h; (b)3 h; (c) 6 h; (d) 24 h.

**Fig.S12** Catalytic performance of *n*-dodecane hydroisomerization on Pt/SAPO-11-10% which was cycled five times.

**Table S1** Texture properties of calcined Pt/SAPO-11-X samples

**Table S2** The Pt loading amount of SAPO-11-X samples

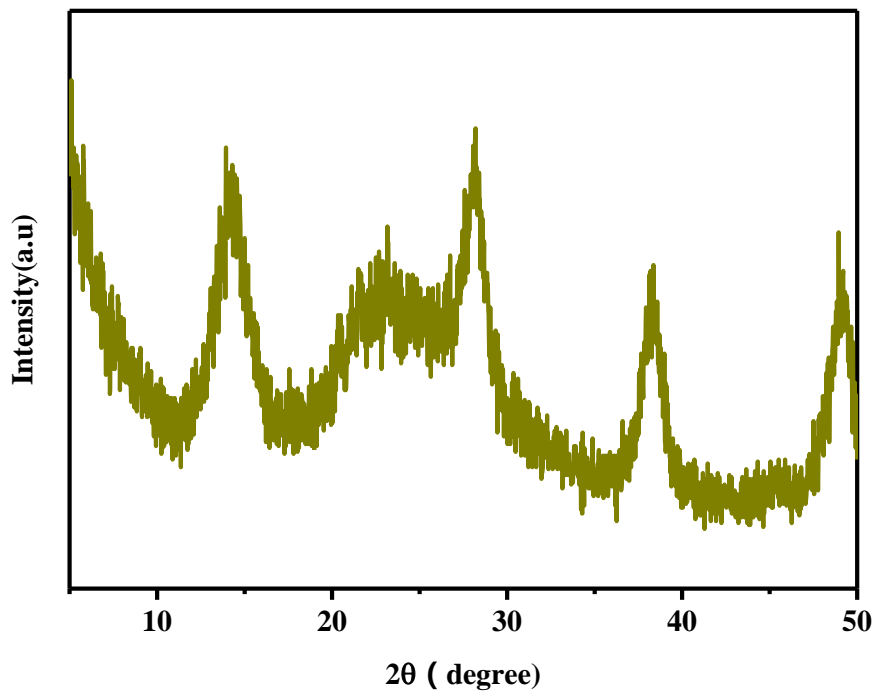

**Fig. S1** The powder XRD patterns of SAPO-11-0%

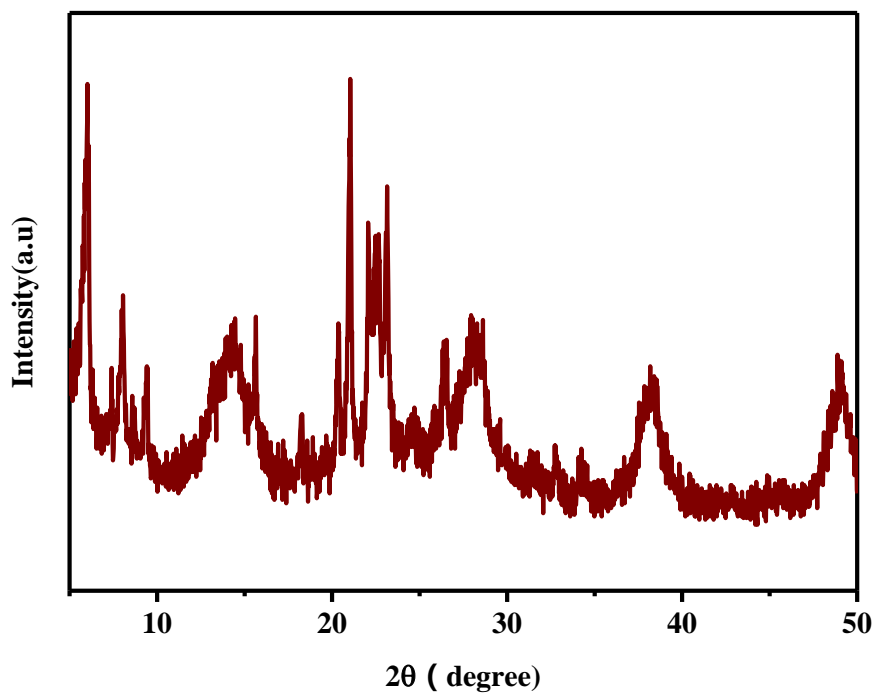

**Fig. S2** The powder XRD patterns of SAPO-11-3%

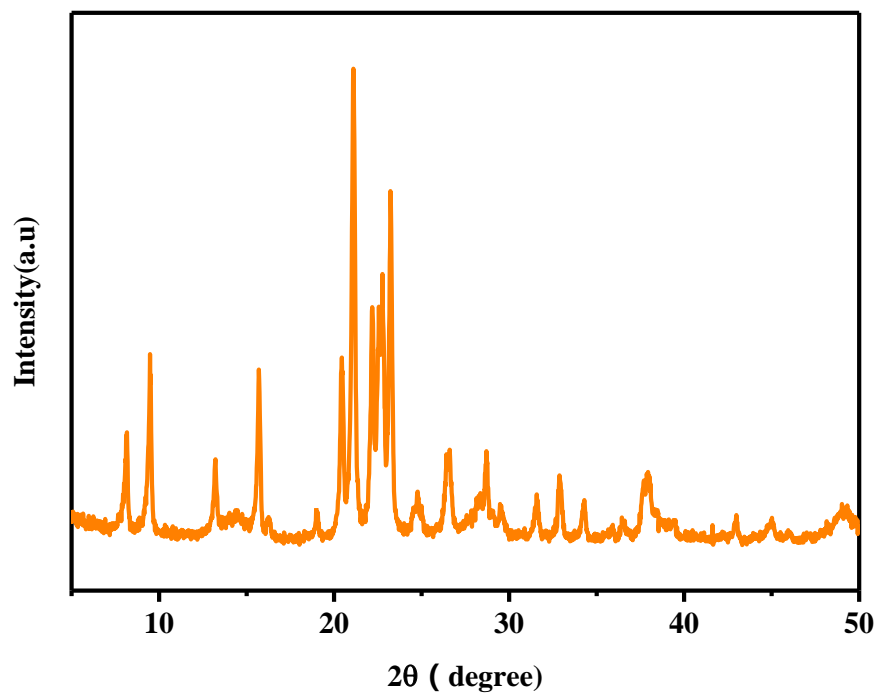

**Fig. S3** The powder XRD patterns of SAPO-11-70%

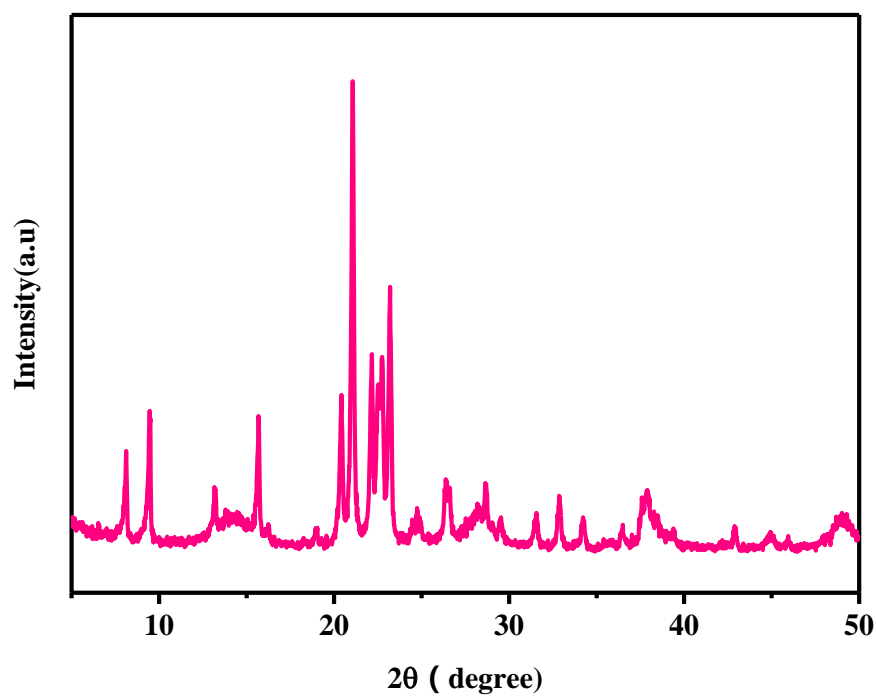

**Fig. S4** The powder XRD patterns of SAPO-11-90%

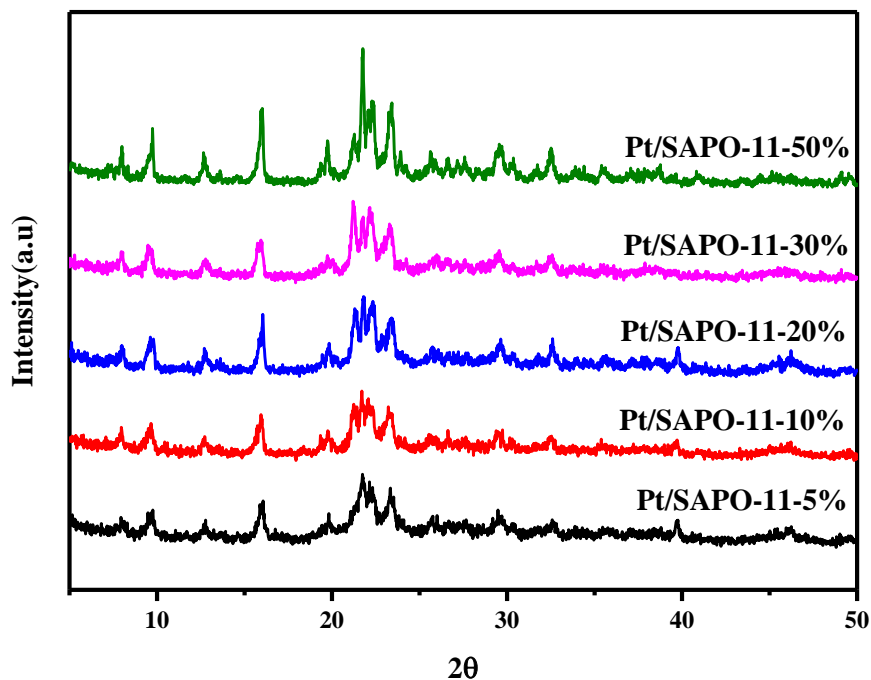

**Fig. S5** The powder XRD patterns of Pt/SAPO-11-X (X=5%, 10%, 20%, 30%, 50%) samples

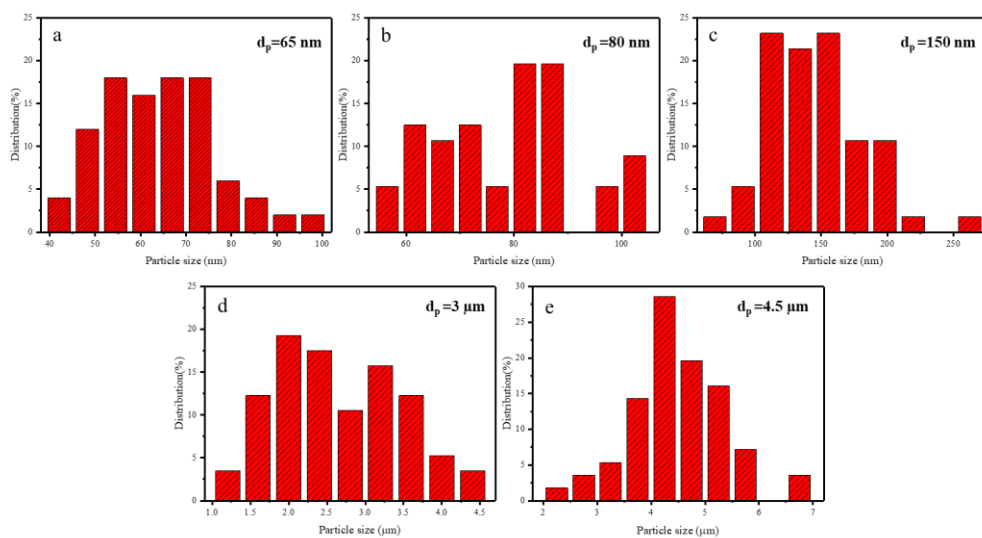

**Fig. S6** SAPO-11 particle size distribution images of (a)SAPO-11-5%; (b)SAPO-11-10%; (c)SAPO-11-20%; (d)SAPO-11-30%; (e)SAPO-11-50%

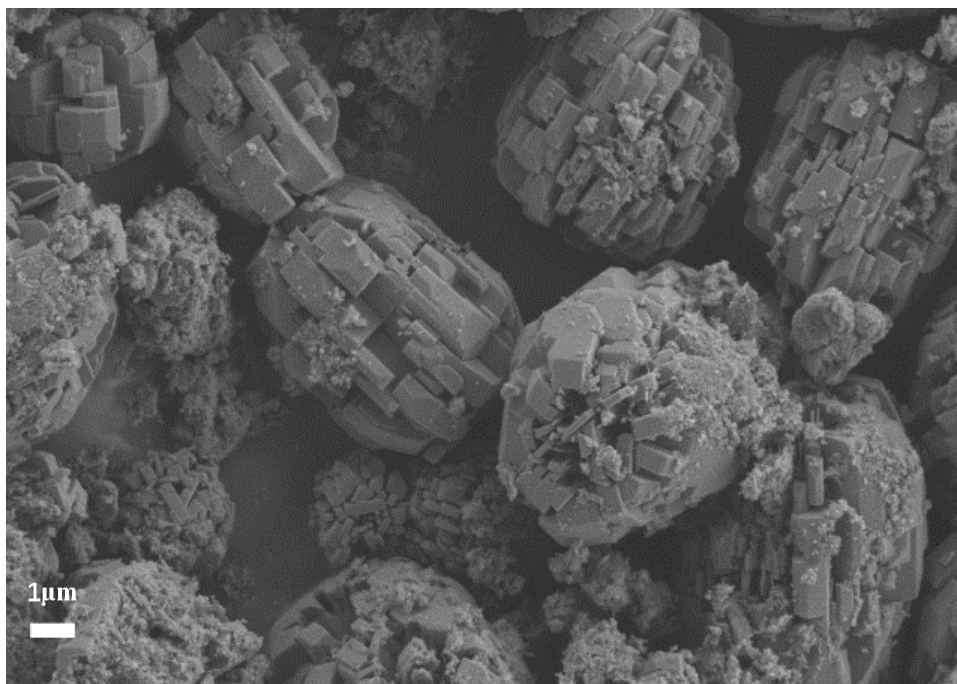

**Fig. S7** SEM images of SAPO-11-70% sample

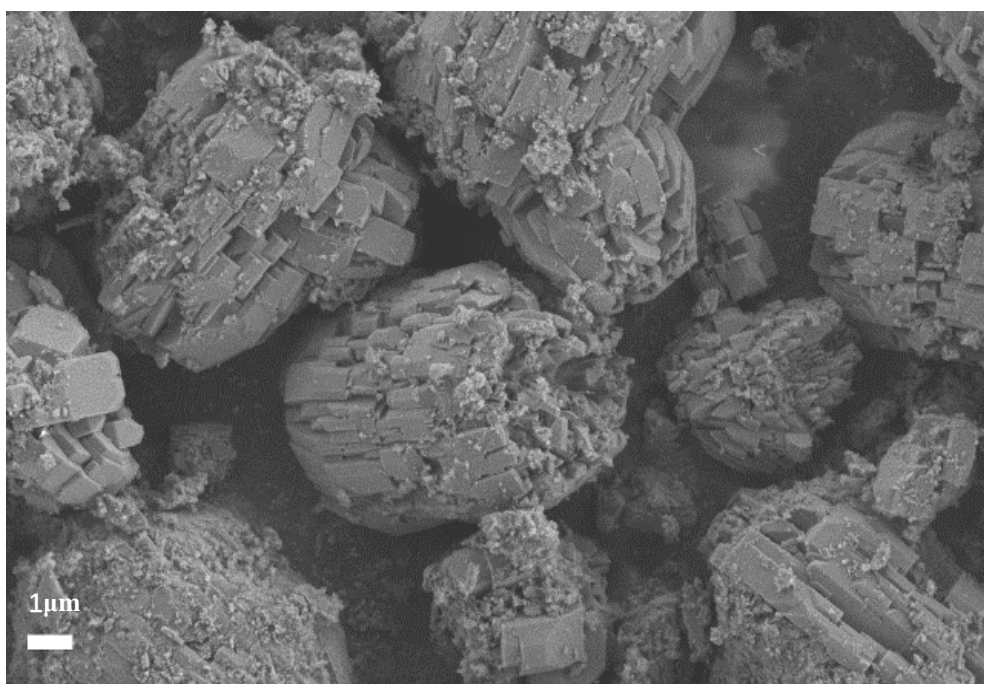

**Fig. S8** SEM images of SAPO-11-90% sample

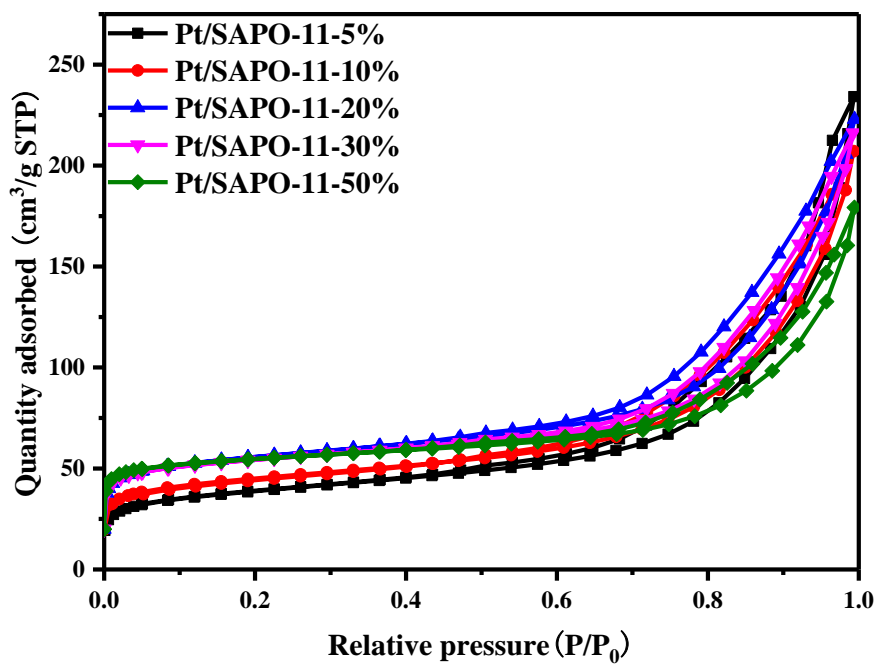

**Fig.S9** N<sub>2</sub> adsorption and desorption isotherms of Pt/SAPO-11-X (X=5%, 10%, 20%, 30%, 50%) samples

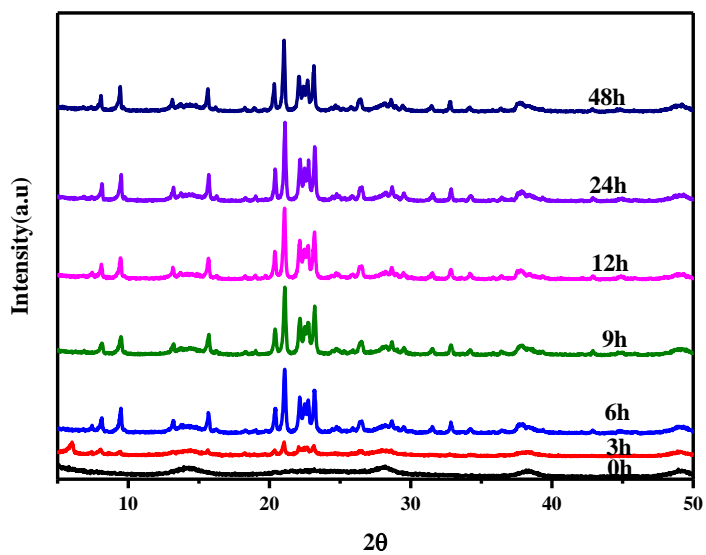

**Fig. S10** XRD patterns of SAPO-11-10% samples prepared with different crystalline times

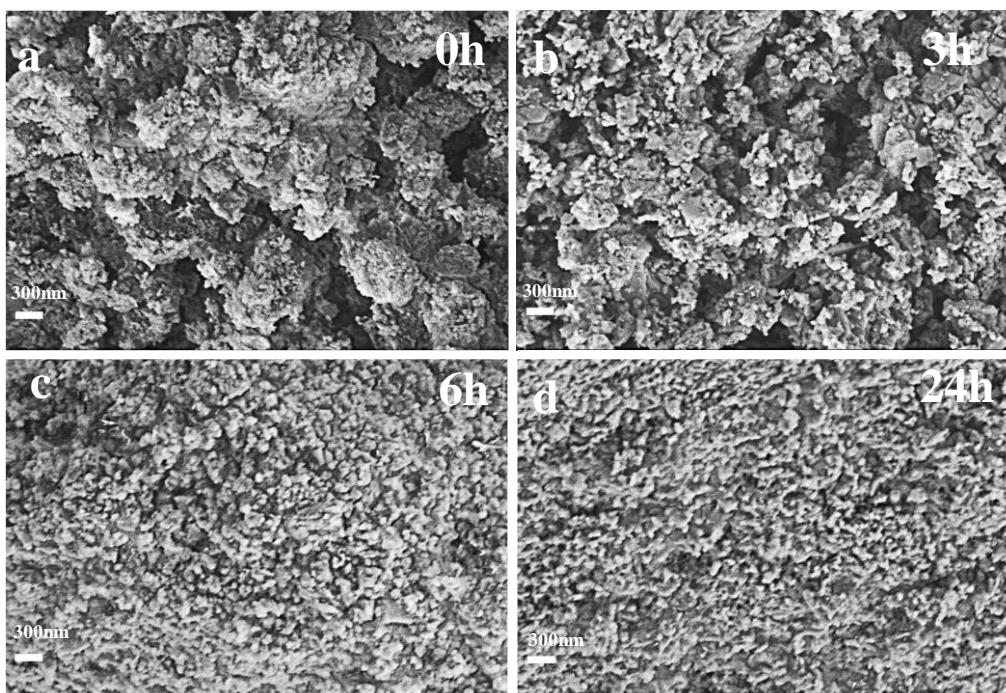

**Fig. S11** SEM images of SAPO-11-10% samples prepared with different crystalline times(a) 0 h; (b)3 h; (c) 6 h; (d) 24 h.

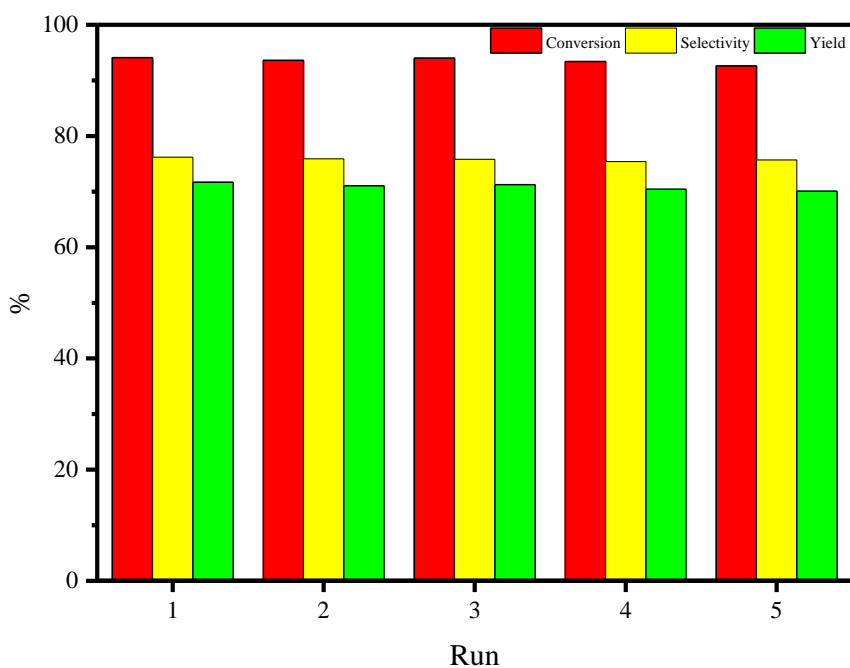

**Fig.S12** Catalytic performance of *n*-dodecane hydroisomerization on Pt/SAPO-11-10% which was cycled for five times



Table S1 Texture properties of calcined Pt/SAPO-11-X samples

| sample                   | Pt/SAPO-11-5% | Pt/SAPO-11-10% | Pt/SAPO-11-20% | Pt/SAPO-11-30% | Pt/SAPO-11-50% |
|--------------------------|---------------|----------------|----------------|----------------|----------------|
| <b>S<sub>BET</sub></b>   | 140.25        | 165.20         | 206.87         | 202.89         | 207.05         |
| <b>S<sub>micro</sub></b> | 54.69         | 81.75          | 126.02         | 129.74         | 149.59         |
| <b>S<sub>ext</sub></b>   | 85.56         | 83.45          | 80.85          | 73.15          | 57.46          |
| <b>V<sub>total</sub></b> | 0.362         | 0.320          | 0.345          | 0.334          | 0.277          |
| <b>V<sub>micro</sub></b> | 0.0237        | 0.034          | 0.0494         | 0.0519         | 0.0595         |

Table S2 The Pt loading amount of SAPO-11-X samples

| Sample   | Pt/SAPO-11-5% | Pt/SAPO-11-10% | Pt/SAPO-11-20% | Pt/SAPO-11-30% | Pt/SAPO-11-50% |
|----------|---------------|----------------|----------------|----------------|----------------|
| Pt/wt. % | 0.44          | 0.47           | 0.42           | 0.49           | 0.47           |
